# Supplementary material
Source: HighWire-hosted journal article supplement (https://svn.smart01.highwire.org/content/svn-2024-003592)

**Supplement Figure 1. Low-field (0.23T) MRI device dimensions.**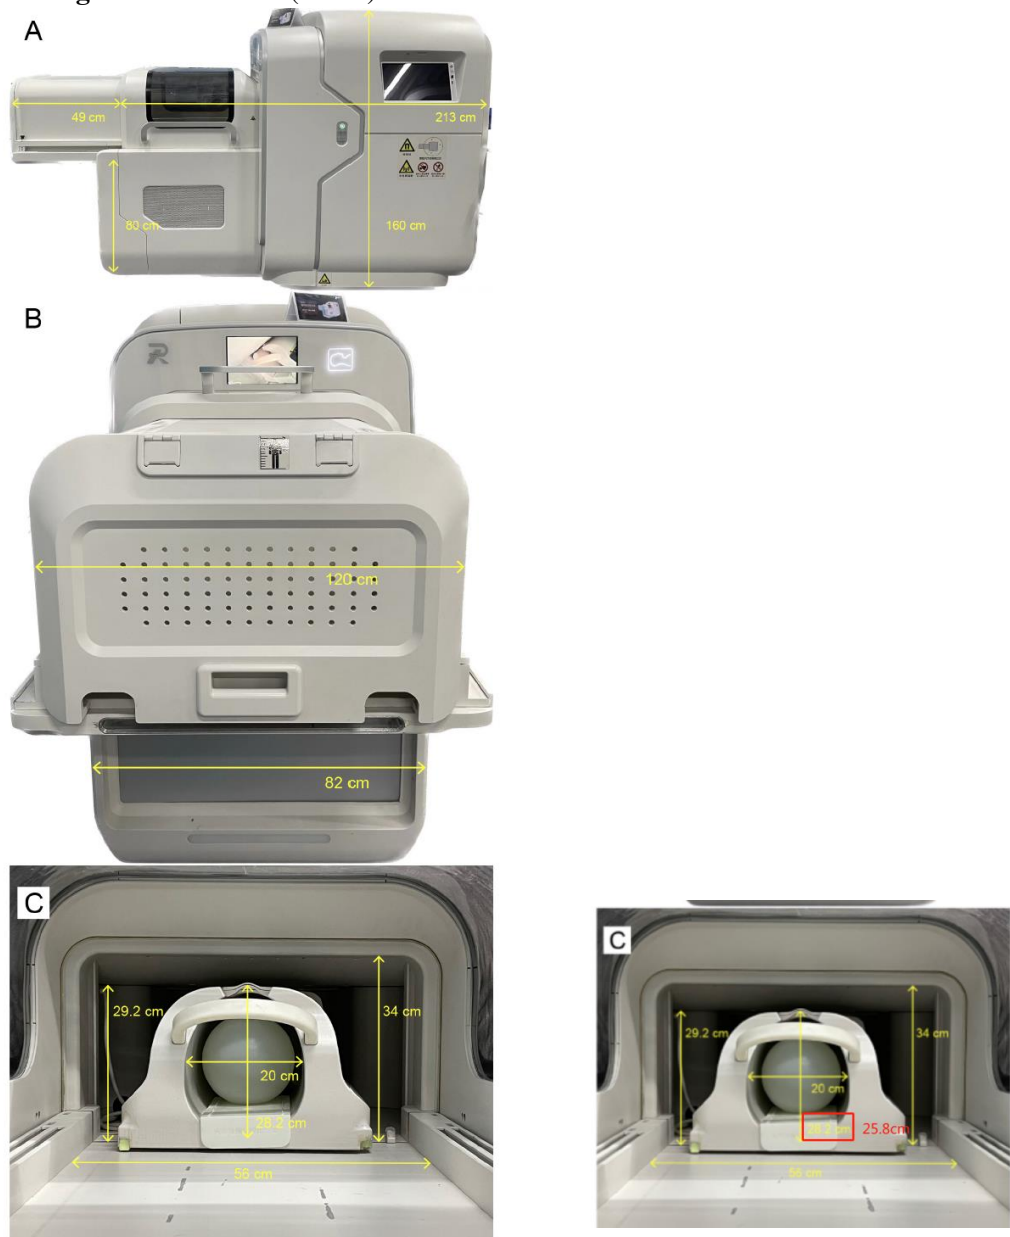

**Supplement Figure 2.** The changing signals of hemorrhagic, ischemic, and normal brain parenchyma based on inversion time values at 0.23-T MRI.

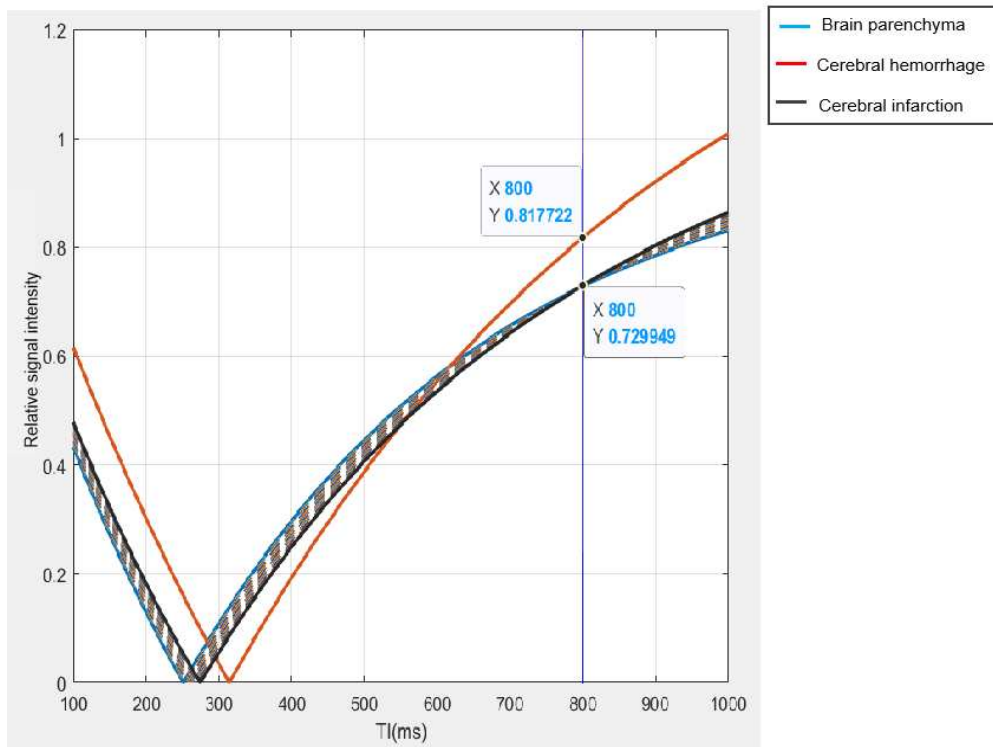

Supplement: inline-supplementary-material-1 [file inline-supplementary-material-1.pdf]
